# Supplementary material for: Qualitative Analysis Related to Palynological Characterization and Biological Evaluation of Propolis from Prespa National Park (Greece)
Source: MDPI journal article supplement (doi:10.3390/molecules27207018), 2022-10-18
Supplement: s1 [file s1]

# Qualitative Analysis Related to Palynological Characterization and Biological Evaluation of Propolis from Prespa National Park (Greece)

Elisavet Pyrgioti <sup>1</sup>, Konstantia Graikou <sup>1</sup>, Nektarios Aligiannis <sup>1</sup>, Karabournioti Sofia <sup>2</sup>, Ioanna Chinou <sup>1,\*</sup>

<sup>1</sup> Lab of Pharmacognosy and Chemistry of Natural Products, Faculty of Pharmacy National and Kapodistrian University of Athens, Greece. ellipirgioti@gmail.com; kgraikou@pharm.uoa.gr; aligiannis@pharm.uoa.gr

<sup>2</sup> Attiki Bee Culturing Co., Athens, Greece; Kryoneri Attikis, Athens, 14568, Greece. skar@attiki-pittas.gr

\* Correspondence: ichinou@pharm.uoa.gr

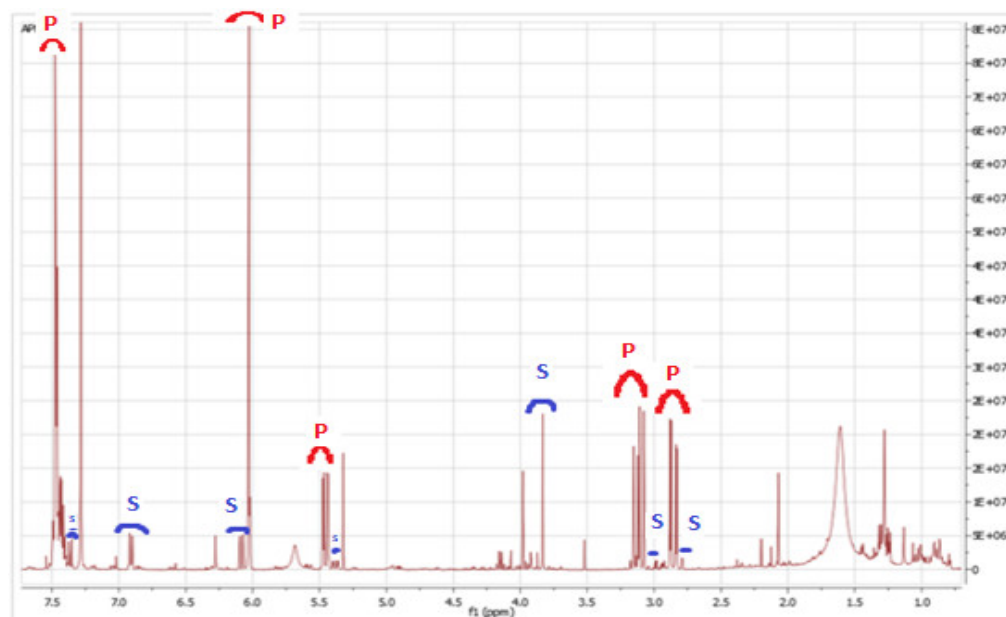

**Figure S1:** <sup>1</sup>H-NMR data of the mixture of P : pinocembrin and S : sakuranetin

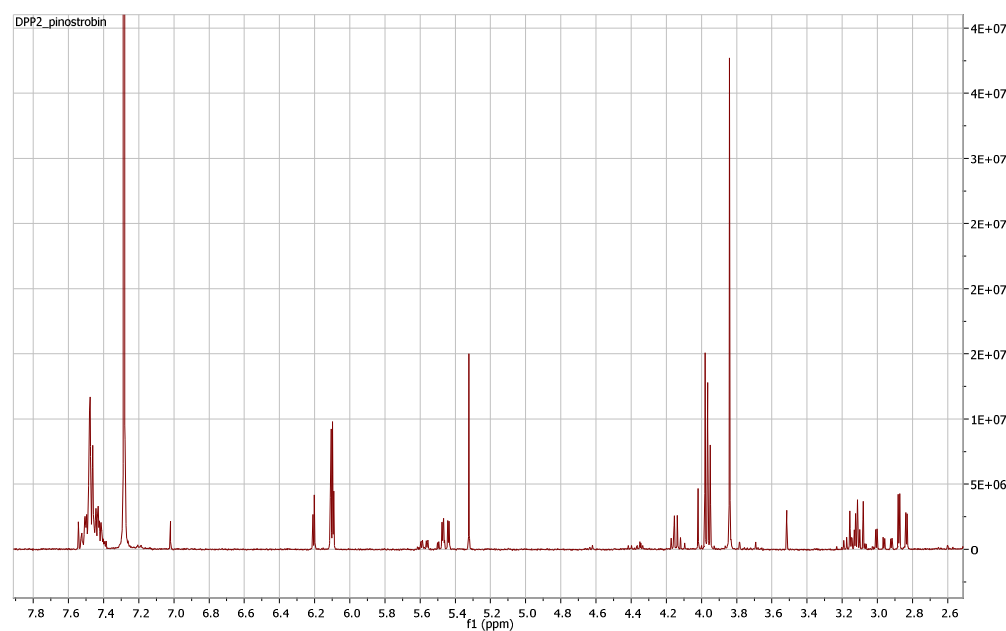

**Figure S2:** <sup>1</sup>H-NMR data of pinostrobin

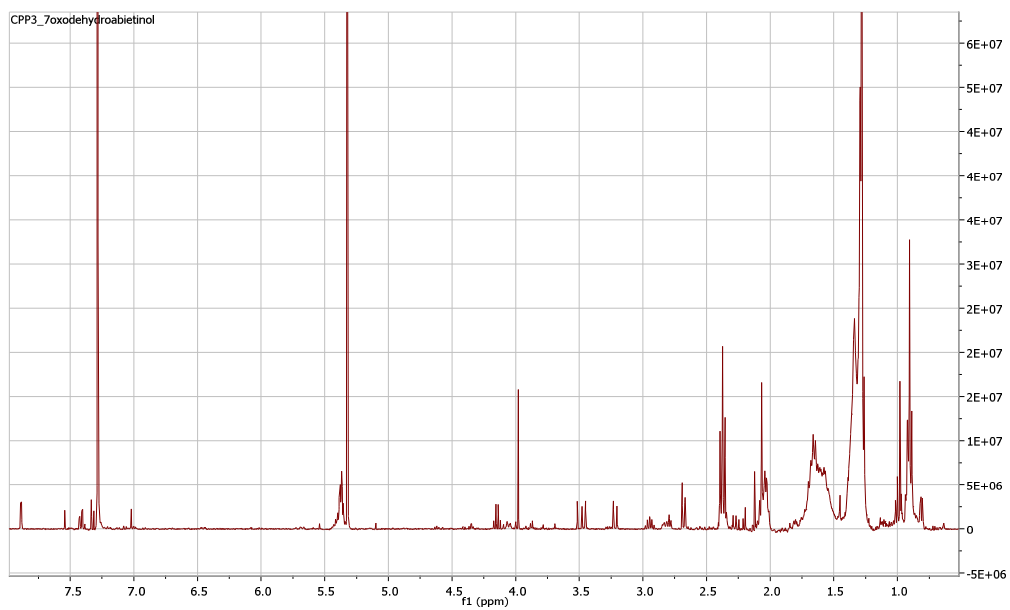

**Figure S3:**  $^1\text{H}$ -NMR data of 7-oxo-dehydroabietinol

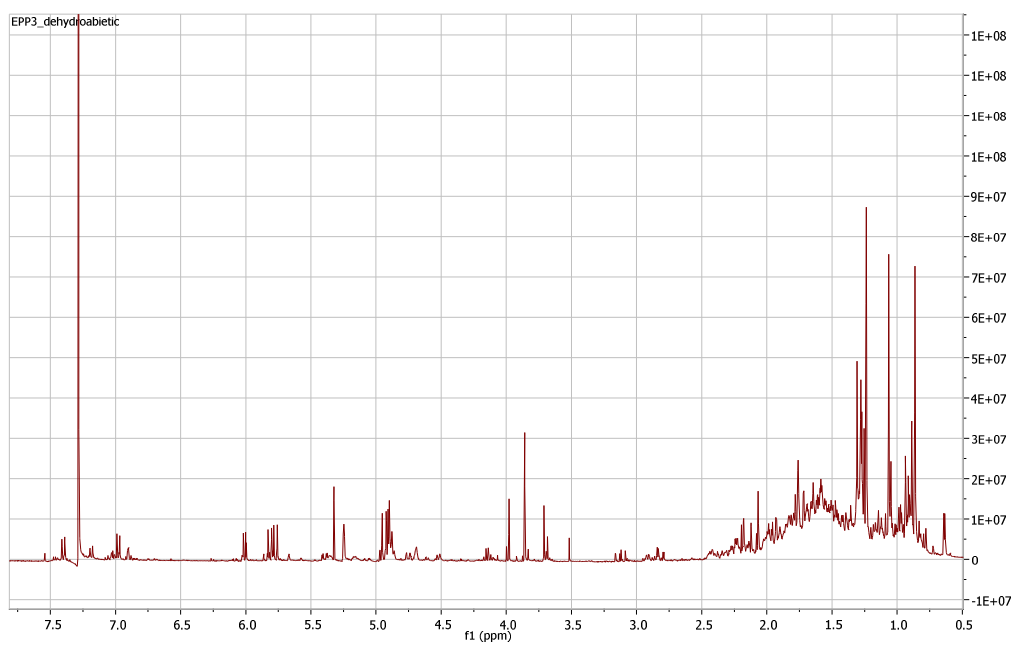

**Figure S4:**  $^1\text{H}$ -NMR data of dehydroabietic acid

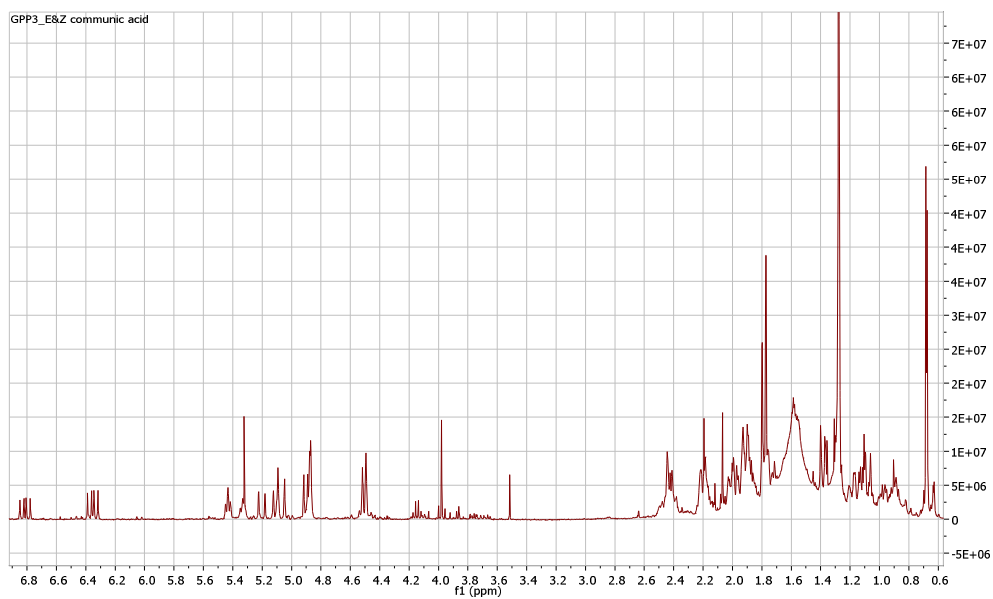

**Figure S5:**  $^1\text{H}$ -NMR data of the mixture of *E*-communis acid and *Z*-communis acid

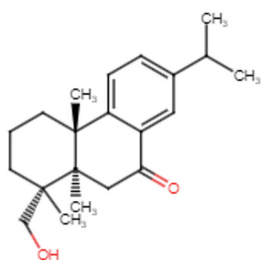

**Formula S1:** The structure of 7-oxo-dehydroabietinol
